# Supplementary material for: Low-Pressure Plasma-Processed Ruthenium/Nickel Foam Electrocatalysts for Hydrogen Evolution Reaction
Source: MDPI journal article supplement (doi:10.3390/ma15072603), 2022-04-01
Supplement: s1 [file s1]

## (Supplementary Information)

### Low-Pressure-Plasma-Processed Ruthenium/Nickel Foam Electrocatalysts for Hydrogen Evolution Reaction

Chen Liu<sup>1,2</sup>, Chia-Yun Tseng<sup>1,2</sup>, Ying-Chyi Wang<sup>1,2</sup>, I-Chun Cheng<sup>3,4</sup>, Jian-Zhang Chen<sup>1,2,4,5,\*</sup>

<sup>1</sup> Graduate Institute of Applied Mechanics, National Taiwan University, Taipei City 10617, Taiwan

<sup>2</sup> Advanced Research Center for Green Materials Science and Technology, National Taiwan University, Taipei City 10617, Taiwan

<sup>3</sup> Graduate Institute of Photonics and Optoelectronics and Department of Electrical Engineering, National Taiwan University, Taipei City 10617, Taiwan

<sup>4</sup> Innovative Photonics Advanced Research Center (i-PARC), National Taiwan University, Taipei City 10617, Taiwan

<sup>5</sup> Graduate School of Advanced Technology, National Taiwan University, Taipei City 10617, Taiwan

\* Correspondence: jchen@ntu.edu.tw (J.Z.C.); Tel.: +886-2-33665694 (J.Z.C.)

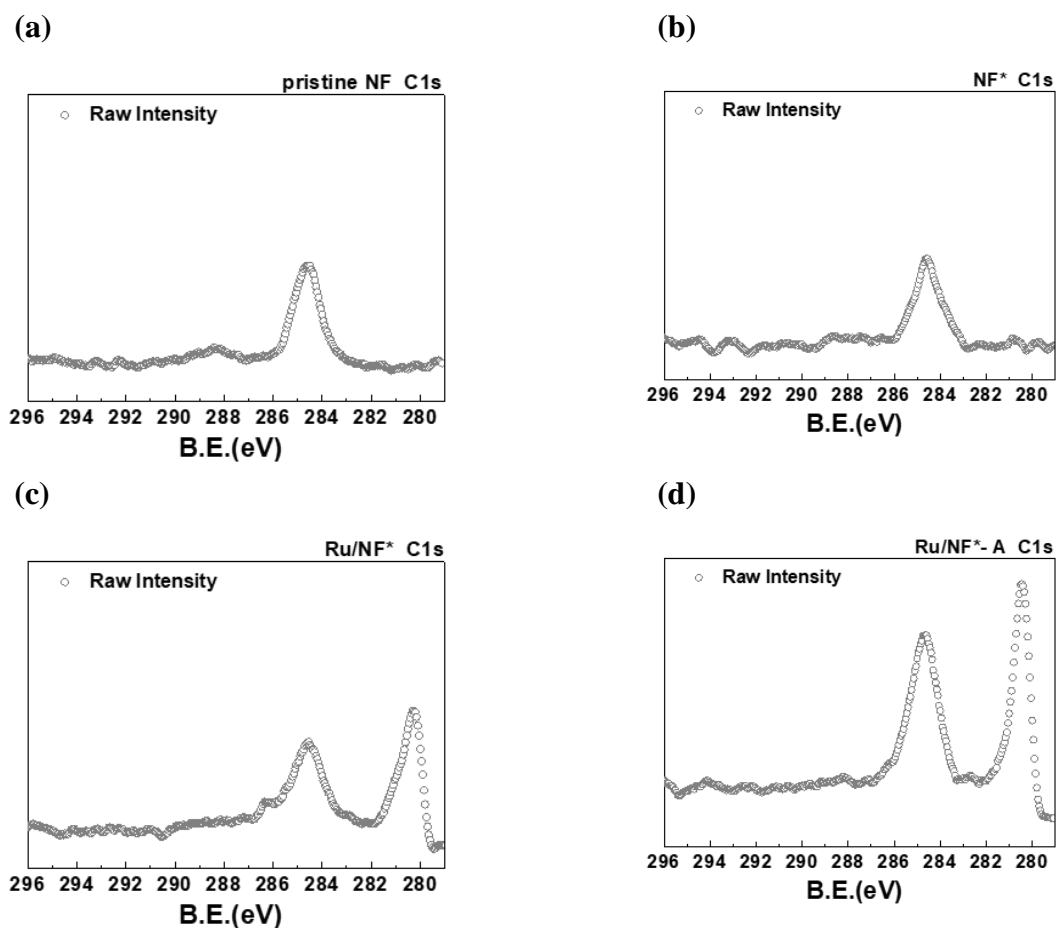

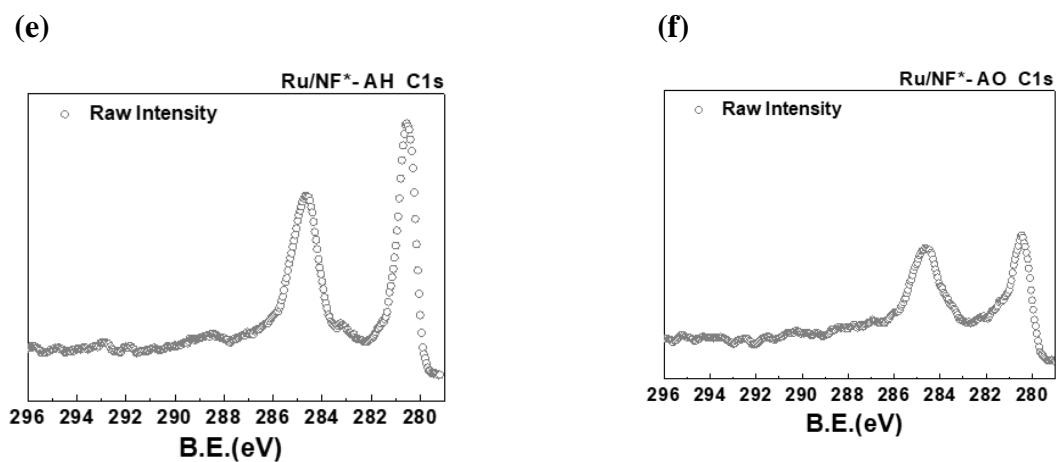

**Figure S1.** XPS spectra of C1s for the catalytic activity of (a) pristine NF, (b) NF\*, (c) Ru/NF\*, (d) Ru/NF\*- A, (e) Ru/NF\*- AH, (f) Ru/NF\*- AO.

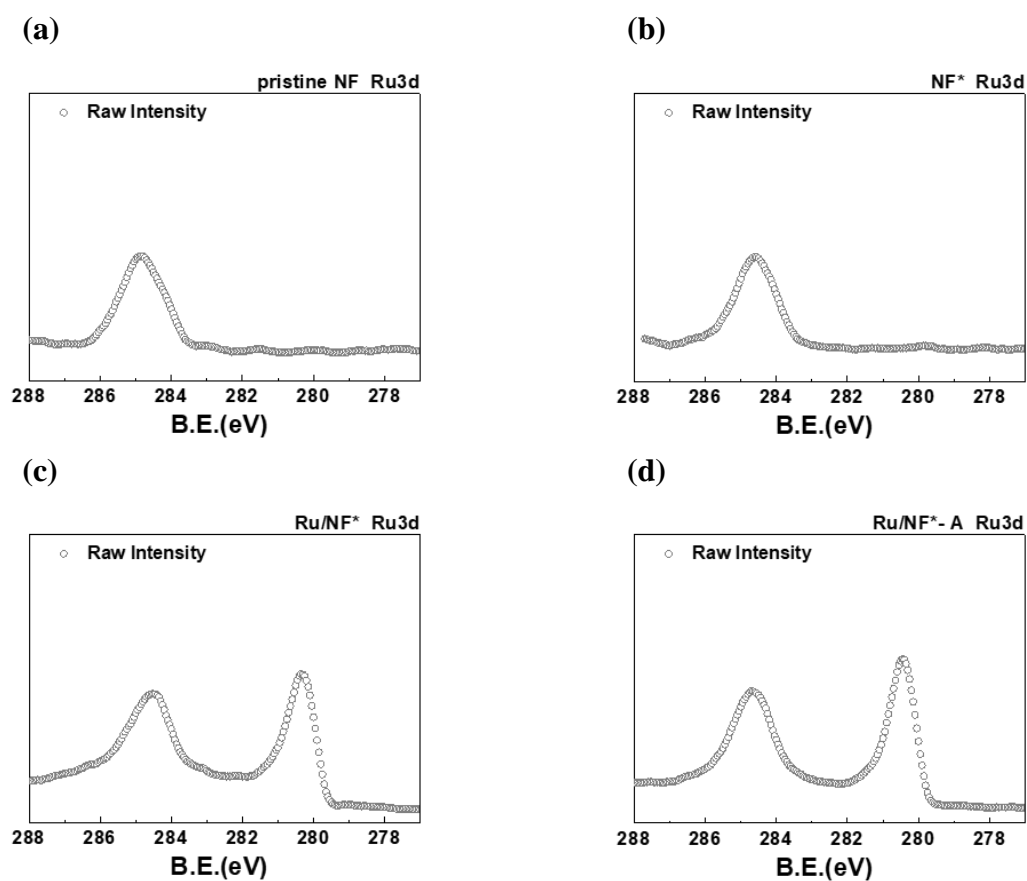

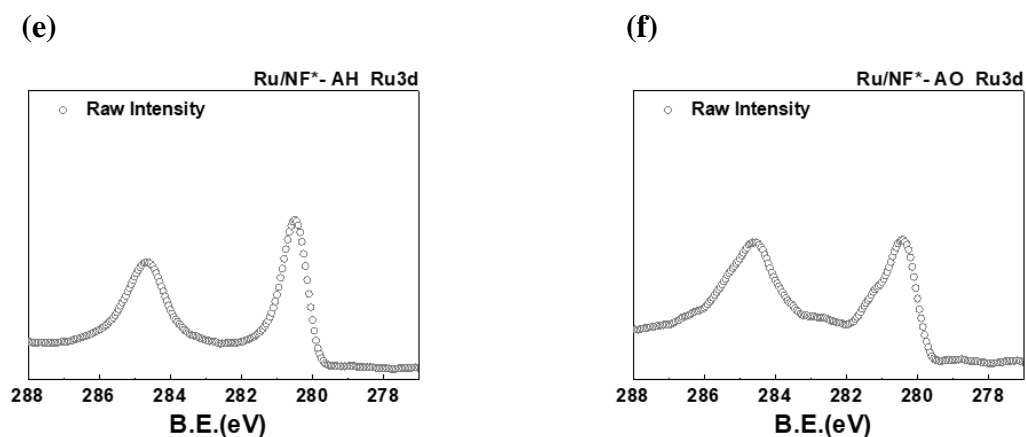

**Figure S2** XPS spectra of Ru3d for catalytic activity of (a) pristine NF, (b) NF\*, (c) Ru/NF\*, (d) Ru/NF\*- A, (e) Ru/NF\*- AH, and (f) Ru/NF\*- AO.

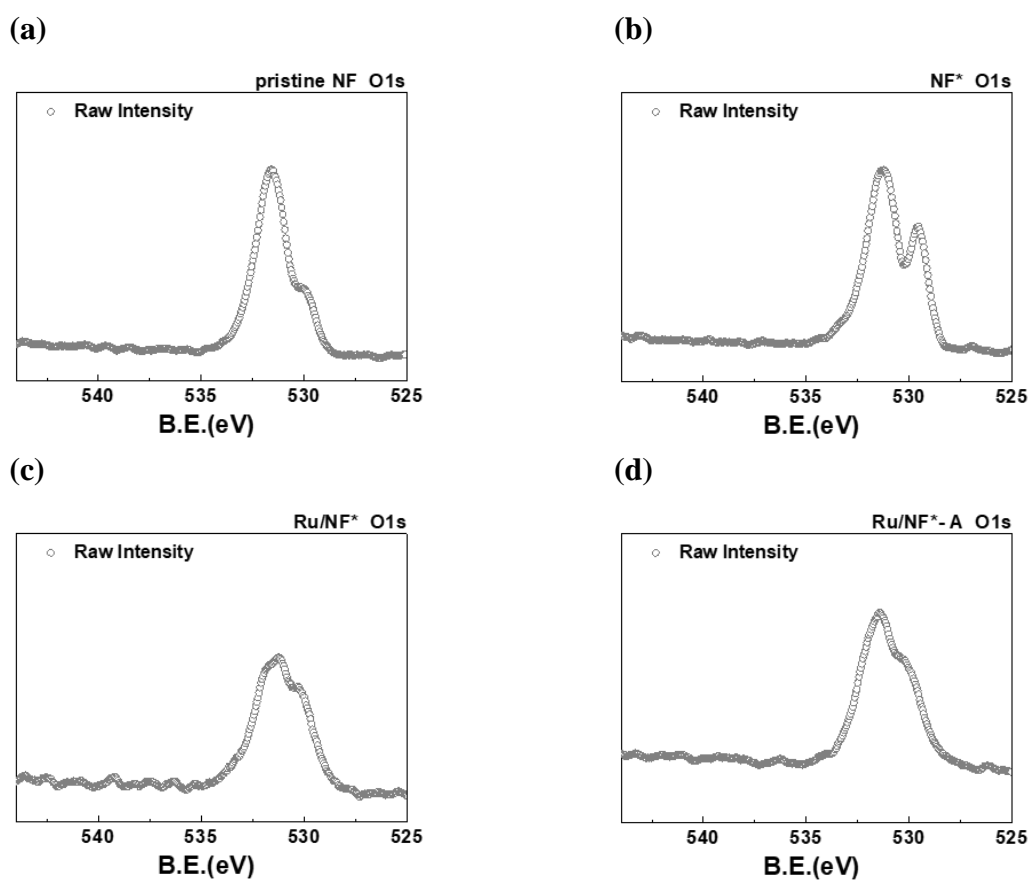

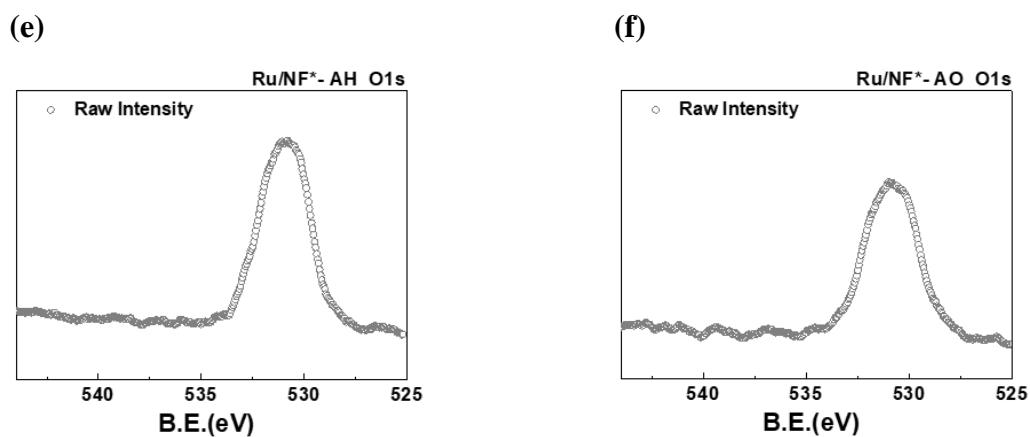

**Figure S3** XPS spectra of O1s for catalytic activity of (a) pristine NF, (b) NF\*, (c) Ru/NF\*, (d) Ru/NF\*-A, (e) Ru/NF\*-AH, and (f) Ru/NF\*-AO.

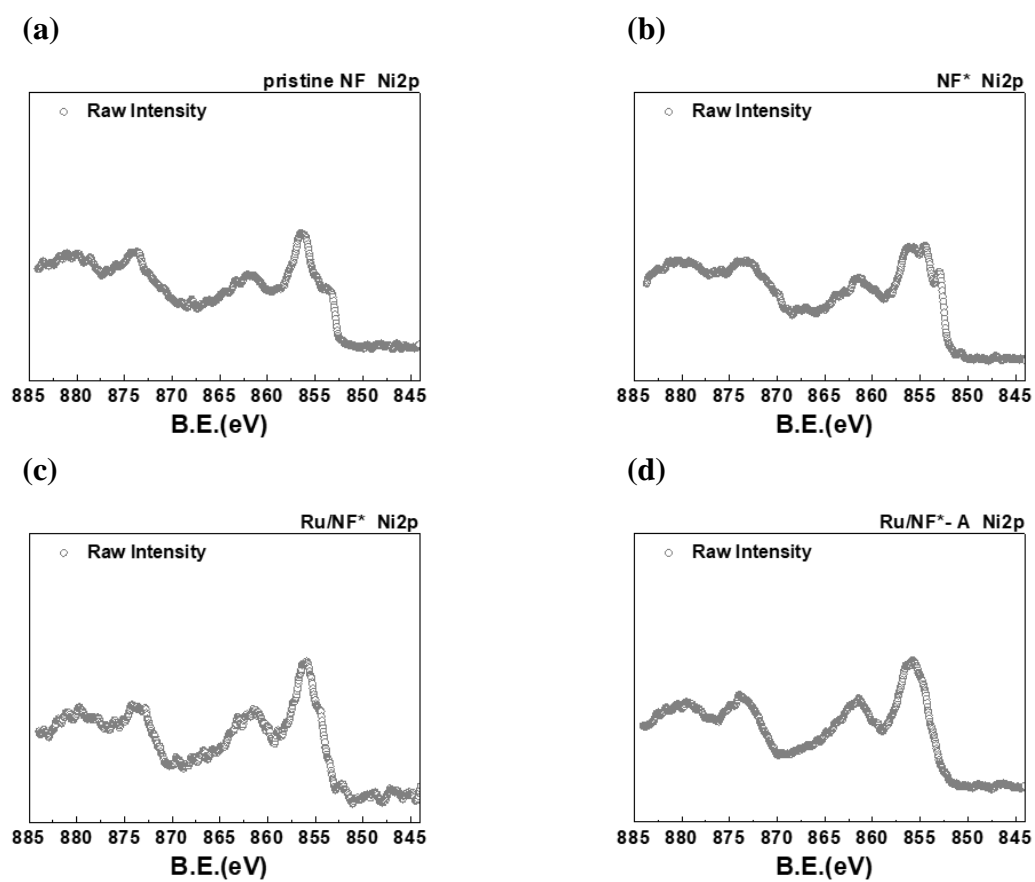

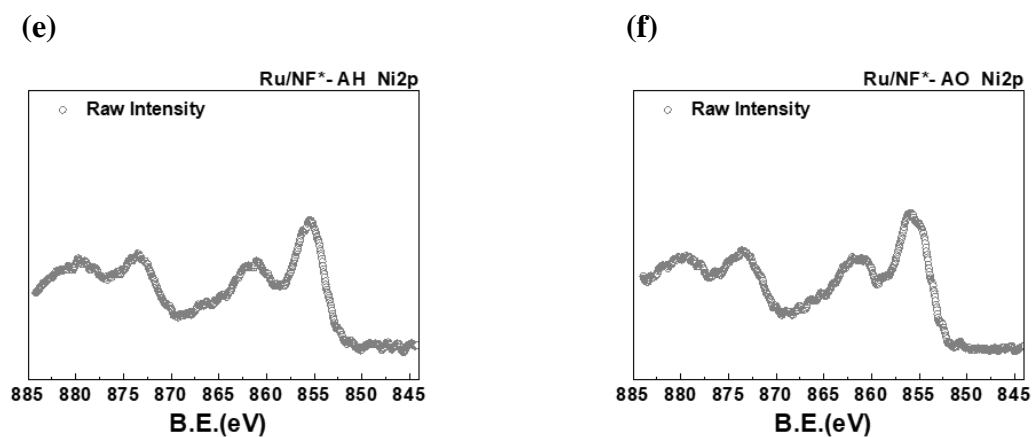

**Figure S4** XPS spectra of Ni<sub>2p</sub> for catalytic activity of (a) pristine NF, (b) NF\*, (c) Ru/NF\*, (d) Ru/NF\*-A, (e) Ru/NF\*-AH, and (f) Ru/NF\*-AO.

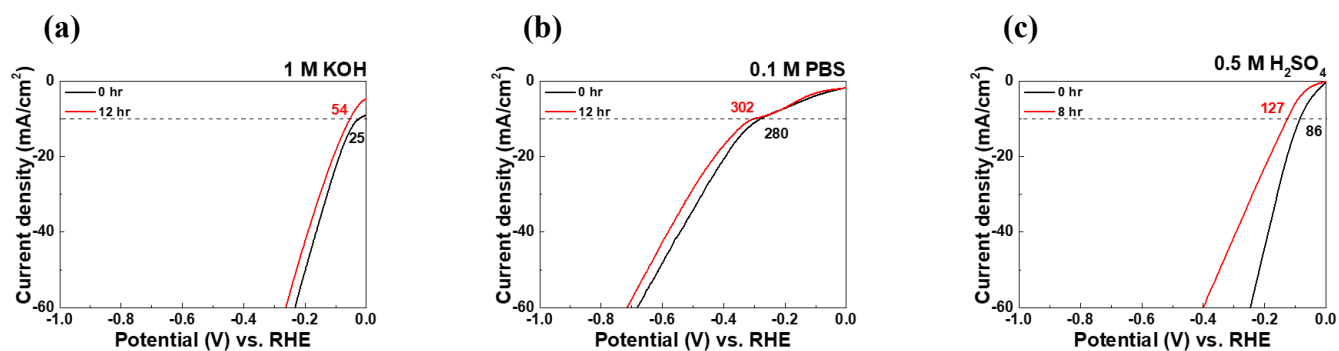

**Figure S5** LSV polarization curves for HER catalyzed by Ru/NF\*-AO before and after a durability test in (a) 1 M KOH, (a) 0.1 M PBS, and (c) 0.1 M H<sub>2</sub>SO<sub>4</sub> aqueous solutions.
